# Supplementary material
Source: MDPI journal article supplement (https://www.mdpi.com/2073-4344/11/7/816)
Supplement: s1 [file s1]

# **Supplementary Materials: Comparative Analysis of Universal Protein Extraction Methodologies for Screening of Lipase Activity from Agricultural Products**

Jisu Ha, Jun-Young Park, Yoonseok Choi, Pahn-Shick Chang and Kyung-Min Park

This document file contains Supplementary Data (S1–S5).

**Supplementary Data S1.** Screening of lipase activity in 87 kinds of domestic agricultural products

| Classification | Source name          | Scientific name             | Concentration <sup>1</sup><br>(mg/mL) | Specific activity <sup>2</sup><br>(μU/mg) | Specific activity <sup>3</sup><br>(μU/mg) |
|----------------|----------------------|-----------------------------|---------------------------------------|-------------------------------------------|-------------------------------------------|
| Potatoes       | Potato               | <i>Solanum tuberosum</i>    | 3.06                                  | 757.52                                    | 135.64                                    |
|                | Jerusalem artichoke  | <i>Helianthus tuberosus</i> | 4.93                                  | 74.41                                     | 24.20                                     |
| Nuts and seeds | Acorn                | <i>Quercus serrata</i>      | 3.52                                  | 201.81                                    | 15.51                                     |
|                | Ginkgo nut           | <i>Ginkgo biloba</i>        | 12.99                                 | 155.39                                    | 19.46                                     |
|                | Chestnut             | <i>Castanea crenata</i>     | 8.74                                  | 253.15                                    | 27.25                                     |
|                | Peanut               | <i>Arachis hypogaea</i>     | 14.29                                 | 128.15                                    | 6.31                                      |
|                | Watermelon seed      | <i>Citrullus lanatus</i>    | 5.52                                  | 140.95                                    | 9.21                                      |
|                | Hemp seed            | <i>Cannabis sativa</i>      | 13.72                                 | 191.46                                    | 25.06                                     |
|                | Chia seed            | <i>Salvia hispanica</i>     | 8.15                                  | 31.30                                     | 2.66                                      |
|                | Perilla              | <i>Perilla frutescens</i>   | 8.34                                  | 182.49                                    | 43.02                                     |
|                | Cotton seed          | <i>Gossypium hirsutum</i>   | 14.96                                 | 7.15                                      | 1.09                                      |
|                | Sesame               | <i>Sesamum indicum</i>      | 12.87                                 | 73.79                                     | 7.70                                      |
|                | Pumpkin seed         | <i>Cucurbita moschata</i>   | 12.32                                 | 20.23                                     | 9.15                                      |
|                | Sunflower seed       | <i>Helianthus annuus</i>    | 5.82                                  | 131.91                                    | 1.26                                      |
|                | Pine nut             | <i>Pinus gerardiana</i>     | 11.39                                 | 84.58                                     | 35.54                                     |
|                | Walnut               | <i>Juglans regia</i>        | 12.75                                 | 28.69                                     | 5.48                                      |
| Cereals        | Rice (non-glutinous) | <i>Oryza sativa</i>         | 6.18                                  | 16.19                                     | 6.45                                      |
|                | Barley               | <i>Hordeum vulgare</i>      | 5.85                                  | 164.92                                    | 19.25                                     |
|                | Wheat                | <i>Triticum aestivum</i>    | 7.30                                  | 83.25                                     | 21.27                                     |
|                | Rice (glutinous)     | <i>Oryza sativa</i>         | 5.82                                  | 71.93                                     | 9.88                                      |
|                | Foxtail millet       | <i>Setaria italica</i>      | 5.85                                  | 111.11                                    | 6.96                                      |

|        |                    |                             |       |        |       |
|--------|--------------------|-----------------------------|-------|--------|-------|
|        | Sorghum            | <i>Sorghum bicolor</i>      | 4.04  | 47.18  | 10.09 |
|        | Job's tears        | <i>Coix lacryma-jobi</i>    | 8.25  | 76.95  | 8.33  |
|        | Rhy                | <i>Secale cereale</i>       | 4.05  | 36.70  | 4.62  |
|        | Proso millet       | <i>Panicum miliaceum</i>    | 5.80  | 447.67 | 18.10 |
|        | Brown rice         | <i>Oryza sativa</i>         | 5.25  | 127.13 | 20.18 |
|        | Quinoa             | <i>Chenopodium quinoa</i>   | 4.41  | 55.61  | 27.32 |
|        | Oat                | <i>Avena sativa</i>         | 7.09  | 85.73  | 32.76 |
|        | Hulled barley      | <i>Hordeum vulgare</i>      | 7.01  | 176.33 | 32.28 |
|        | Amaranth           | <i>Amaranthus viridis</i>   | 4.47  | 65.92  | 16.51 |
|        | Buckwheat          | <i>Fagopyrum esculentum</i> | 9.22  | 106.29 | 22.34 |
| Fruits | Kiwifruit          | <i>Actinidia deliciosa</i>  | 4.68  | 8.85   | 0.30  |
|        | Blueberry          | <i>Vaccinium corymbosum</i> | 3.32  | 13.53  | 2.63  |
|        | Kumquat seed       | <i>Citrus japonica</i>      | 5.78  | 127.40 | 6.06  |
|        | <i>Gyulohyang</i>  | <i>Citrus reticulata</i>    | 3.35  | 8.34   | 5.00  |
|        | Apple              | <i>Malus pumila</i>         | 3.60  | 60.64  | 5.33  |
| Peas   | Adzuki bean        | <i>Vigna Savi</i>           | 14.78 | 91.19  | 13.79 |
|        | Sword bean         | <i>Canavalia gladiata</i>   | 13.24 | 162.91 | 8.92  |
|        | Pea                | <i>Pisum sativum</i>        | 15.20 | 98.20  | 20.10 |
|        | Kidney bean        | <i>Phaseolus vulgaris</i>   | 12.91 | 148.72 | 7.45  |
|        | Mung bean          | <i>Vigna Savi</i>           | 13.65 | 86.09  | 10.74 |
|        | Lentil             | <i>Lens culinaris</i>       | 14.58 | 262.08 | 15.63 |
|        | Chickpea           | <i>Cicer arietinum</i>      | 15.53 | 26.98  | 7.68  |
|        | <i>Jwinunikong</i> | <i>Rhynchosia Nulubilis</i> | 14.24 | 51.56  | 5.11  |

|            |                          |                                     |       |        |        |
|------------|--------------------------|-------------------------------------|-------|--------|--------|
|            | Soybean                  | <i>Glycine max</i>                  | 15.26 | 53.89  | 3.84   |
|            | <i>Seoritae</i>          | <i>Glycine max</i>                  | 14.84 | 33.07  | 4.60   |
|            | Yellow soybean           | <i>Glycine max</i>                  | 14.89 | 37.60  | 5.21   |
|            | Brown soybean            | <i>Glycine max</i>                  | 16.89 | 120.93 | 12.66  |
| Mushrooms  | Shiitake mushroom        | <i>Lentinula edodes</i>             | 6.01  | 24.64  | 13.11  |
|            | Cordyceps                | <i>Cordyceps militaris</i>          | 4.52  | 829.36 | 117.03 |
|            | Eryngii                  | <i>Pleurotus eryngii</i>            | 5.17  | 633.42 | 101.77 |
|            | <i>Agrocybe aegerita</i> | <i>Agrocybe aegerita</i>            | 3.47  | 386.08 | 74.04  |
|            | Lion's mane mushroom     | <i>Hericium erinaceus</i>           | 4.55  | 48.03  | 60.63  |
|            | Cremini mushroom         | <i>Agaricus bisporus</i>            | 7.48  | 107.20 | 2.80   |
|            | Wood ear mushroom        | <i>Auricularia auricula-judae</i>   | 3.66  | 88.42  | 11.23  |
| Vegetables | Onion                    | <i>Allium cepa</i>                  | 4.41  | 44.86  | 7.51   |
|            | Paprika                  | <i>Capsicum annuum</i>              | 3.91  | 35.62  | 6.00   |
|            | Pumpkin                  | <i>Cucurbita moschata</i>           | 5.23  | 182.80 | 30.47  |
|            | Balloonflower            | <i>Platycodon grandiflorus</i>      | 4.27  | 121.00 | 49.21  |
|            | Angelica                 | <i>Angelica archangelica</i>        | 4.82  | 53.52  | 9.76   |
|            | Pleurospermum            | <i>Pleurospermum albimarginatum</i> | 12.81 | 134.47 | 6.62   |
|            | Lotus root               | <i>Nelumbo nucifera</i>             | 5.11  | 328.74 | 11.72  |
|            | Red pepper               | <i>Capsicum annuum</i>              | 11.04 | -17.92 | 0.71   |
|            | Red pepper seed          | <i>Capsicum annuum</i>              | 5.64  | 344.09 | 98.25  |
|            | Garlic                   | <i>Allium sativum</i>               | 8.62  | 377.90 | 6.20   |
|            | Soybean sprout           | <i>Glycine max</i>                  | 5.08  | 53.62  | 9.58   |
|            | Ussuri thistle           | <i>Cirsium japonicum</i>            | 13.61 | 68.80  | 3.44   |
|            | Cheese pumpkin           | <i>Cucurbita moschata Duchesne</i>  | 3.34  | 147.66 | 12.98  |
|            | Toona sinensis           | <i>Toona sinensis</i>               | 6.29  | 113.09 | 18.14  |

|                     |                                              |       |        |        |
|---------------------|----------------------------------------------|-------|--------|--------|
| Cabbage seed        | <i>Brassica oleracea</i>                     | 4.47  | 188.80 | 26.08  |
| Broccoli            | <i>Brassica oleracea</i> var. <i>italica</i> | 5.08  | 325.37 | 83.86  |
| Aster glehnii       | <i>Aster glehnii</i>                         | 4.43  | 86.51  | 4.31   |
| Mugwort             | <i>Artemisia vulgaris</i>                    | 3.75  | 176.86 | 17.07  |
| Goat's-beard        | <i>Aruncus dioicus</i>                       | 3.36  | 88.04  | 11.70  |
| Rough aster         | <i>Eurybia radulina</i>                      | 3.53  | 40.73  | 2.42   |
| Eggplant            | <i>Solanum melongena</i>                     | 4.23  | 49.82  | 16.08  |
| East Asian harebell | <i>Campunula rotundifolia</i>                | 3.74  | 42.78  | 132.09 |
| Butterbur           | <i>Petasites japonicus</i>                   | 3.29  | 28.46  | 2.92   |
| <i>Chamnamul</i>    | <i>Pimpinella brachycarpa</i>                | 4.77  | 139.19 | 17.71  |
| Chinese cabbage     | <i>Brassica rapa</i>                         | 4.42  | 97.67  | 7.97   |
| Rapeseed            | <i>Brassica napus</i>                        | 11.27 | 24.56  | 4.78   |
| Bamboo shoot        | <i>Bambusa vulgaris</i>                      | 5.18  | 58.30  | 6.11   |
| Fischers ragwort    | <i>Ligularia fischeri</i>                    | 4.35  | 29.12  | 1.48   |
| <i>Deodeok</i>      | <i>Codonopsis lanceolata</i>                 | 4.36  | 92.87  | 55.88  |
| Radish seed         | <i>Raphanus sativus</i>                      | 12.19 | 34.43  | 2.96   |
| Nettle-leaf mint    | <i>Urtica dioica</i>                         | 4.26  | 56.60  | 6.05   |
| Bracken             | <i>Pteridium esculentum</i>                  | 5.50  | 748.99 | 41.67  |

<sup>1</sup> Protein concentration after extraction by Pierce™ Plant Total Protein Extraction Kit (Thermo Fisher Scientific Co.).

<sup>2</sup> Evaluated by the spectrophotometric assay.

<sup>3</sup> Evaluated by the fluorometric assay.

**Supplementary Data S2.** Final candidates of domestic agricultural products (24 kinds)

| Number | Source name       | Scientific name                       |
|--------|-------------------|---------------------------------------|
| 1      | Potato            | <i>Solanum tuberosum</i>              |
| 2      | Ginkgo nut        | <i>Ginkgo biloba</i>                  |
| 3      | Chestnut          | <i>Castanea crenata</i>               |
| 4      | Hemp seed         | <i>Cannabis sativa</i>                |
| 5      | Perilla           | <i>Perilla frutescens</i>             |
| 6      | Pine nut          | <i>Pinus gerardiana</i>               |
| 7      | Wheat             | <i>Triticum aestivum</i>              |
| 8      | Oat               | <i>Avena sativa</i>                   |
| 9      | Hulled barley     | <i>Hordeum vulgare</i>                |
| 10     | Buckwheat         | <i>Fagopyrum esculentum</i>           |
| 11     | Adzuki bean       | <i>Vigna Savi</i>                     |
| 12     | Pea               | <i>Pisum sativum</i>                  |
| 13     | Mung bean         | <i>Vigna Savi</i>                     |
| 14     | Lentil            | <i>Lens culinaris</i>                 |
| 15     | Brown soybean     | <i>Glycine max</i>                    |
| 16     | Cordyceps         | <i>Cordyceps militaris</i>            |
| 17     | Eryngii           | <i>Pleurotus eryngii</i>              |
| 18     | Agrocybe aegerita | <i>Agrocybe aegerita</i>              |
| 19     | Pumpkin           | <i>Cucurbita moschata</i>             |
| 20     | Balloonflower     | <i>Platycodon grandiflorus</i>        |
| 21     | Red pepper seed   | <i>Capsicum annuum</i>                |
| 22     | Broccoli          | <i>Brassica oleracea var. italica</i> |
| 23     | Deodeok           | <i>Codonopsis lanceolata</i>          |
| 24     | Bracken           | <i>Pteridium esculentum</i>           |

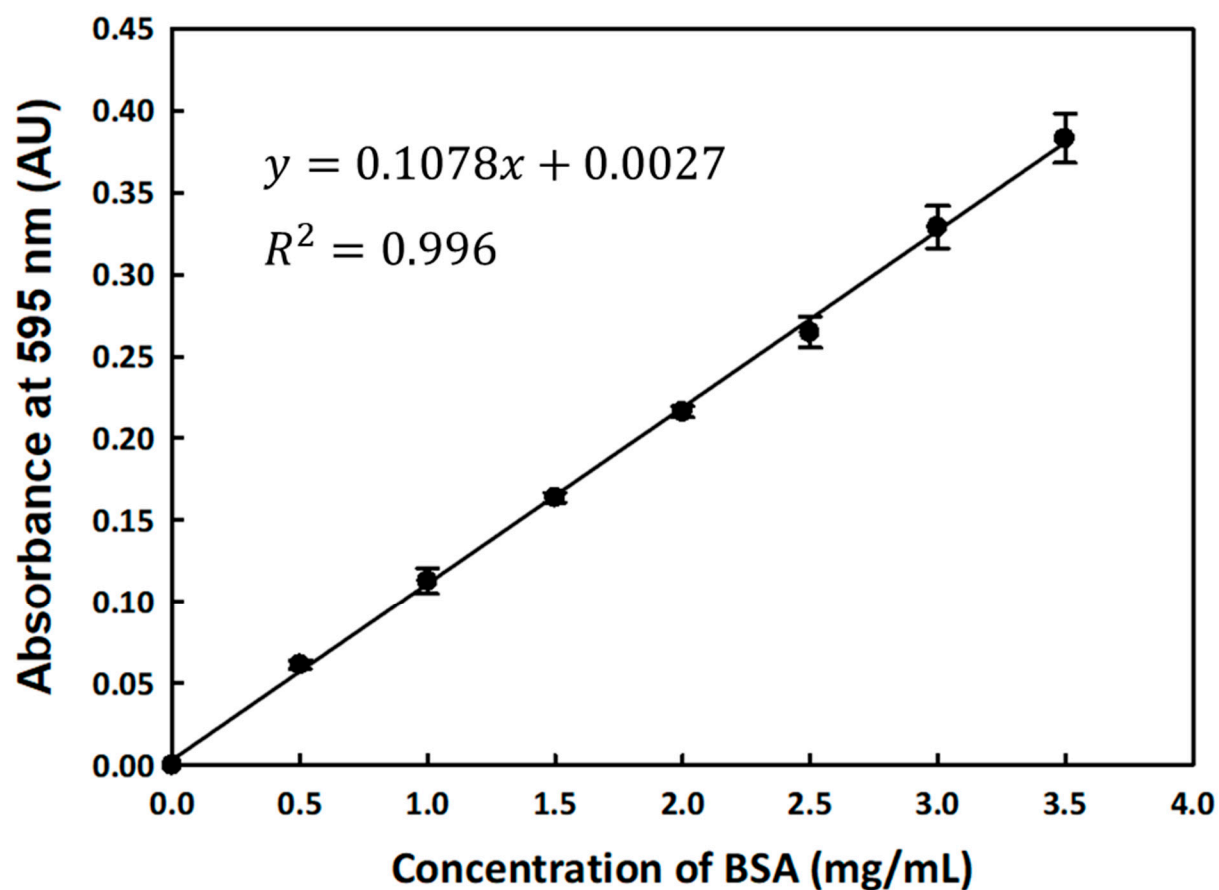

**Supplementary Data S3.** Standard curves of bovine serum albumin (BSA) concentration versus absorption unit (AU) referring to the absorbance at 595 nm for Bradford assay.

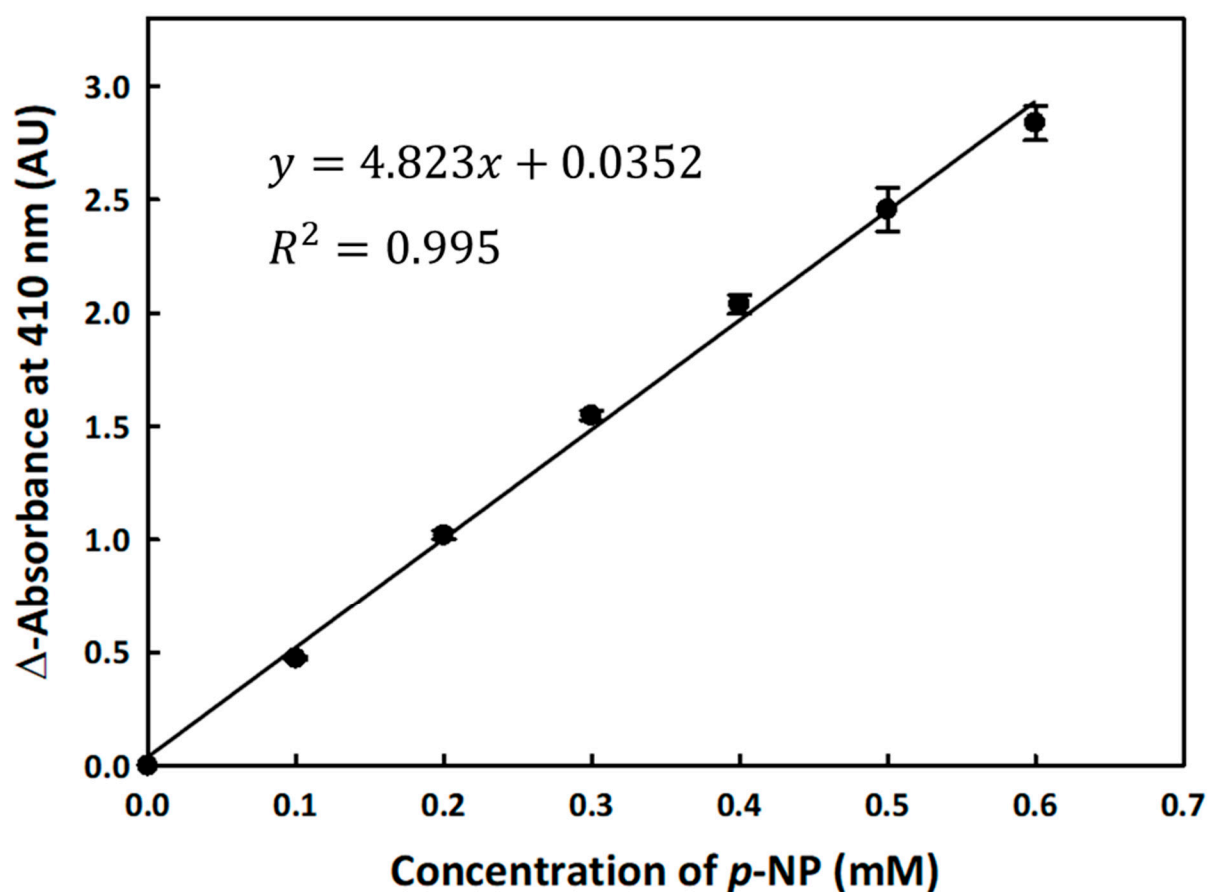

**Supplementary Data S4.** Standard curves of *p*-nitrophenol (*p*-NP) concentration versus absorption unit (AU) referring to the absorbance at 410 nm.

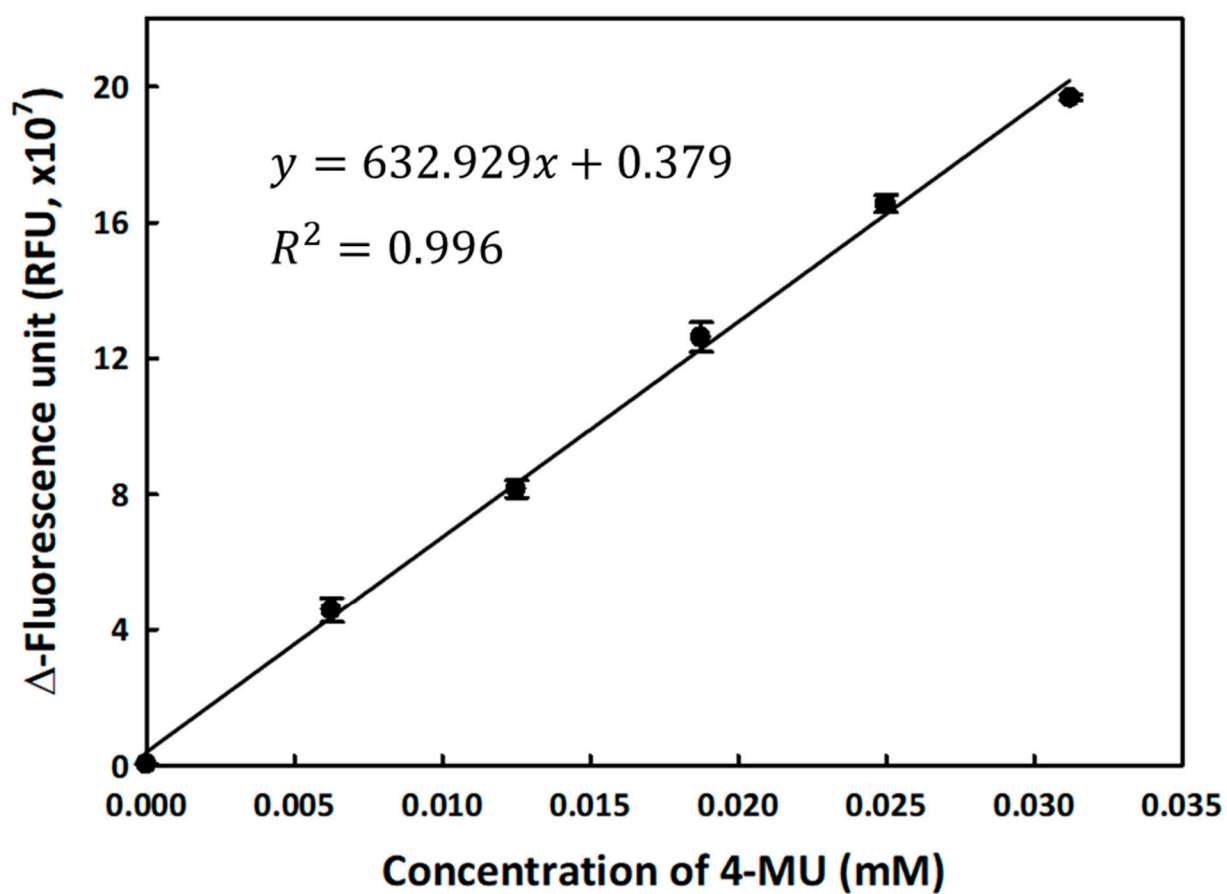

**Supplementary Data S5.** Standard curves of 4-methylumbelliferone (4-MU) concentration versus relative fluorescence unit (RFU) referring to the emission fluorescence at 455 nm.
